# Supplementary material
Source: PubMed Central journal article supplement (PMC5561302)
Supplement: AEM.00656-17_zam999118016s1.pdf [file AEM.00656-17_zam999118016s1.pdf]

## Supplemental Material

### Genome analysis of *Endomicrobium proavitum* reveals loss and gain of relevant functions during the evolution of intracellular symbionts

Hao Zheng, Carsten Dietrich, Andreas Brune

#### Description

*SI\_Figures\_Zheng\_Endomicrobia.pdf*

**Fig. S1** Phylogenetic analysis of the glucose 6-phosphate transporter UhpC.

**Fig. S2** Phylogenetic analysis of the catalytic subunit of the ferredoxin/flavodoxin dependent 2-oxoacid oxidoreductases.

**Fig. S3** Phylogenetic analysis of the catalytic subunit (EchE) of [NiFe]-hydrogenases.

**Fig. S4** Phylogenetic analysis of isopropylmalate/citramalate/homocitrate synthases.

**Fig. S5** Phylogenetic analysis of transporter proteins for aromatic (A) amino acids, (B) proline, and (C) serine.

**Fig. S6** Phylogenetic analysis of amino acid sequences of ThiE (A) and ThiH (B).

*SI\_Dataset\_S1-2\_Zheng\_Endomicrobia.xlsx*

**Dataset S1** Complete list of genes in the genome of *Endomicrobium proavitum*. Genes with orthologs (amino acid sequence similarity > 50%) in the genomes of “*Ca. Endomicrobium trichonymphae*” strain Rs-D17, *Elusimicrobium minutum*, or both genomes are marked.

**Dataset S2** Genes of “*Ca. Endomicrobium trichonymphae*” strain Rs-D17 that have no homologs in *Endomicrobium proavitum* (amino acid sequence similarity < 50%). CDS with assigned functions are highlighted, and the amino acid sequence similarities to the top BLAST hits in sequenced genomes are given.

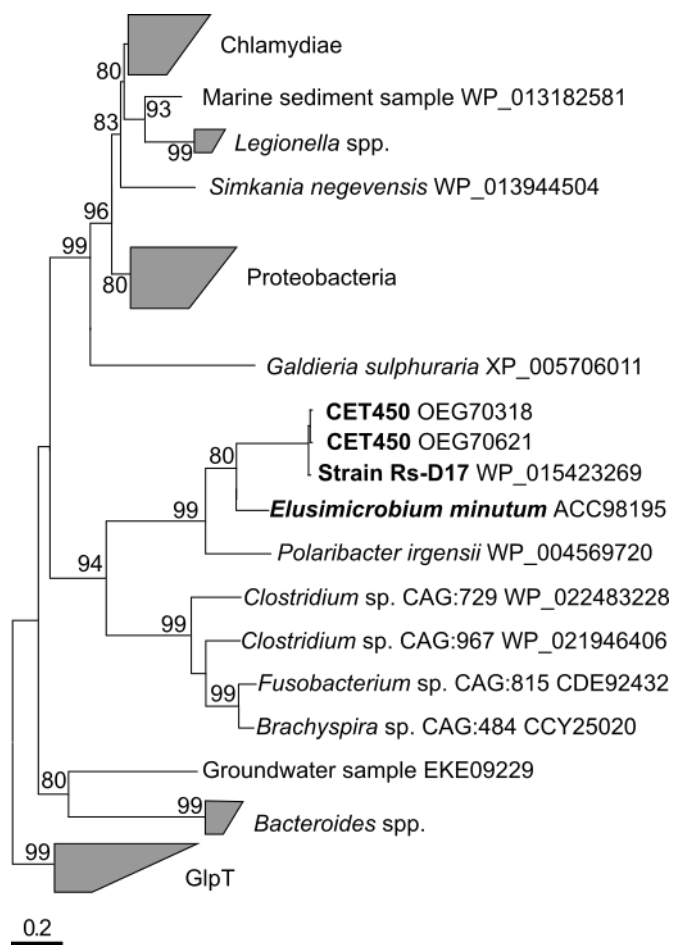

**Fig. S1** Phylogenetic analysis of the glucose 6-phosphate transporter UhpC. The maximum-likelihood tree is based on an alignment of 525 amino acid positions of the top 150 BLAST hits of the ortholog in strain Rs-D17 against the UniRef90 database (1). The tree was inferred under the WAG+G+F model and rooted with the bacterial glycerol 3-phosphate transporter GlpT, a paralog of UhpC. Orthologs from the *Elusimicrobia* phylum are shown in bold.

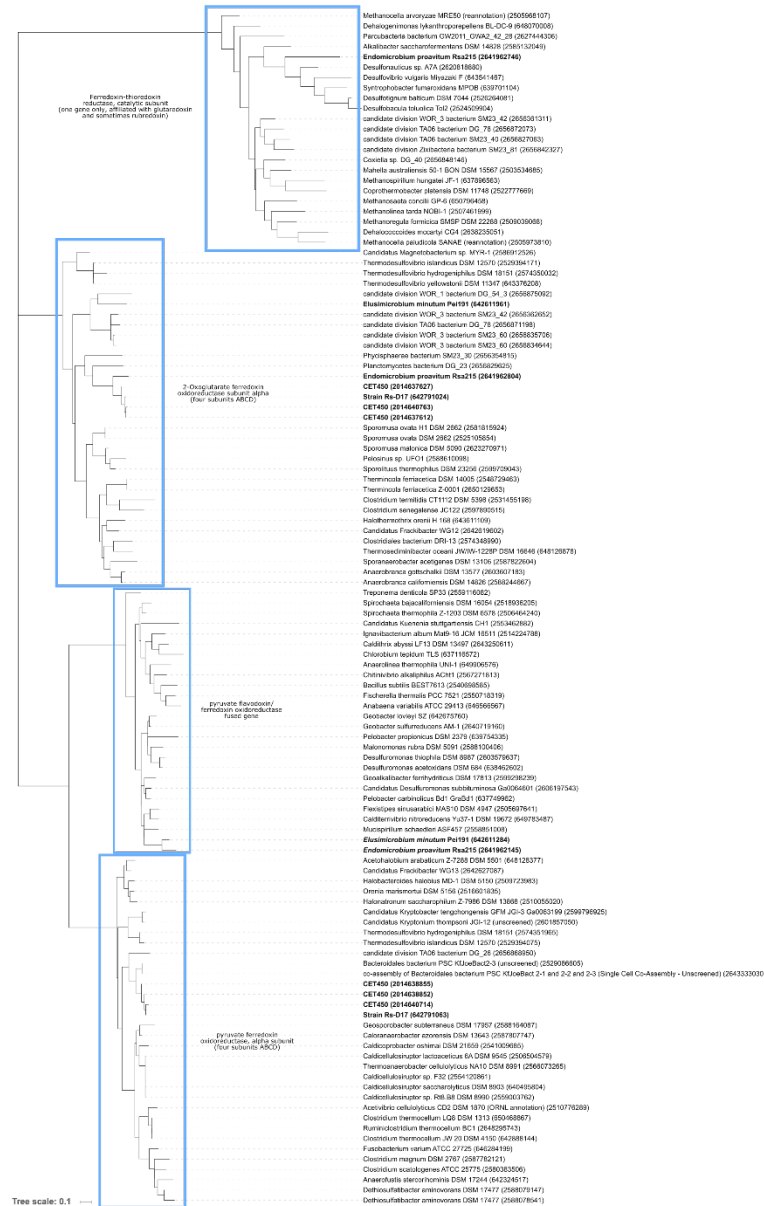

**Fig. S2** Phylogenetic analysis of the catalytic subunit of the ferredoxin/flavodoxin dependent 2-oxoacid oxidoreductases encoded in the genomes of *E. proavitum* and *Ca. E. trichonymphae* strain Rs-D17. The unrooted maximum-likelihood tree is based on an alignment of amino acid sequences of representative orthologs in other bacteria, including those with the top 100 bitscores displayed using the *homology toolkit* of the IMG/ER platform (2). Orthologs from the *Elusimicrobia* phylum are shown in bold.

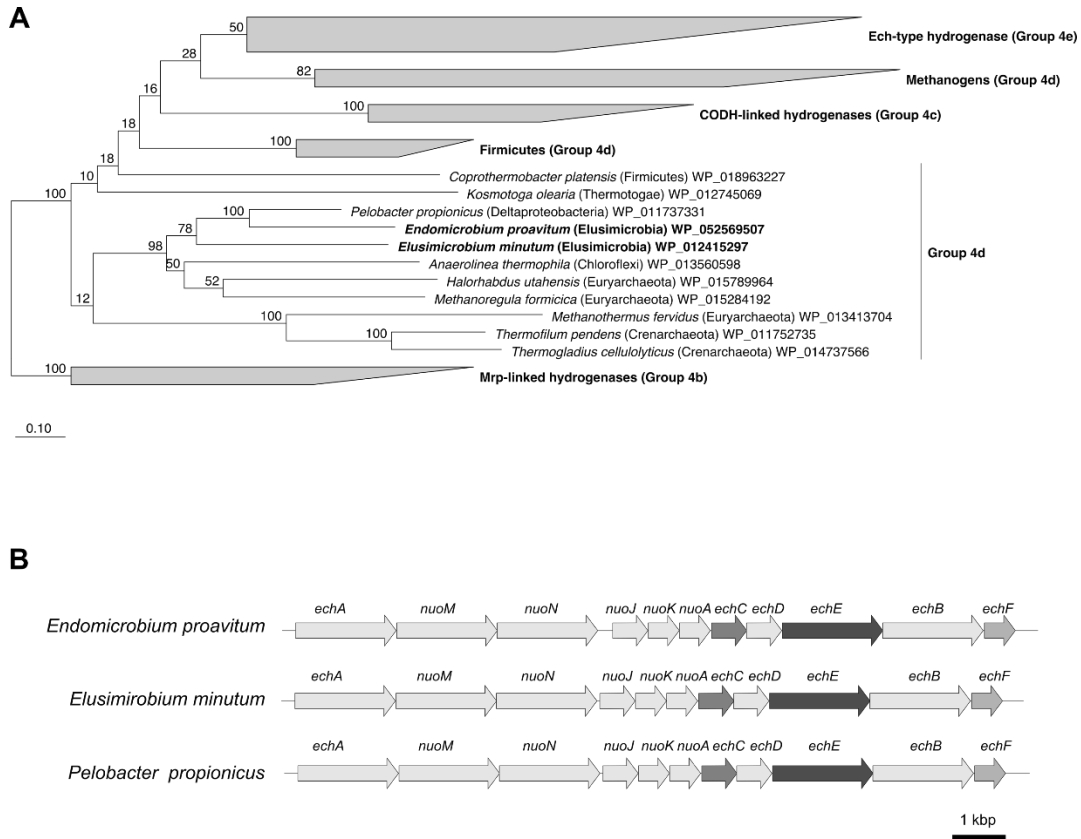

**Fig. S3** (A) Phylogenetic analysis of the catalytic subunit (EchE) of [NiFe]-hydrogenases (Group 4), focusing on the relationship between orthologs from *E. proavitum* and *El. minutum* (marked in bold) and other bacteria and archaea. The maximum-likelihood tree is based on the comprehensive dataset reported by Greening *et al.* (3). (B) Organization of the gene sets encoding the [NiFe]-hydrogenases in *E. proavitum* and bacteria with the most closely related orthologs of the *echE* gene.

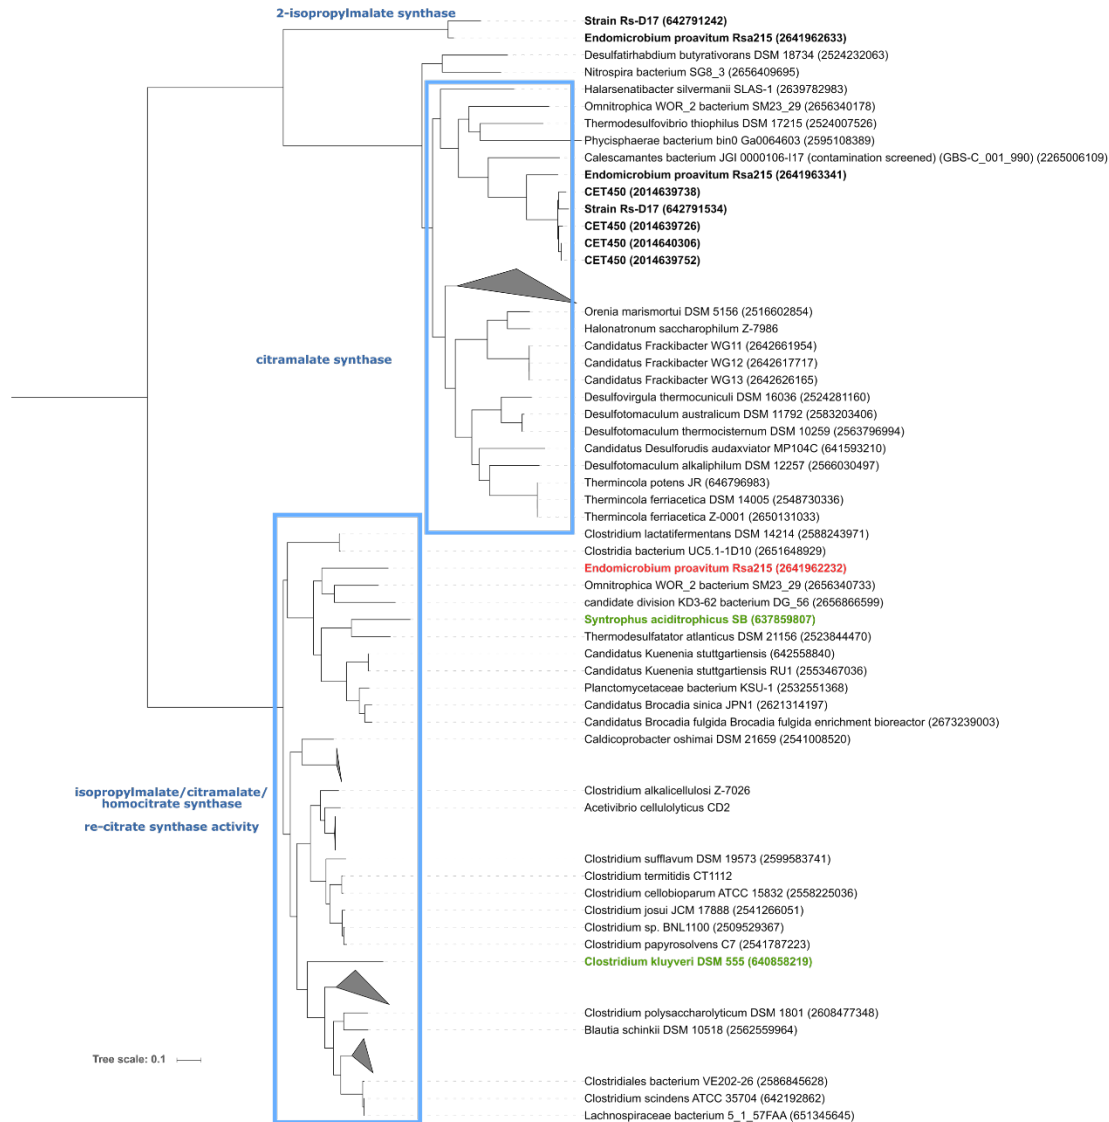

**Fig. S4** Phylogenetic analysis of isopropylmalate/citramalate/homocitrate synthases encoded in the genomes of *E. proavitum* and strain Rs-D17. The unrooted maximum-likelihood tree is based on an alignment of amino acid sequences of representative orthologs in other bacteria, including those with the top 100 bitscores displayed using the *homology toolkit* of the IMG/ER platform (2). The orthologs with *re-citrate* synthase activity (green), the putative *re-citrate* synthase of *E. proavitum* (red), and orthologs annotated as *bona fide* isopropylmalate and citramalate synthases in *Endomicrobia* (black) are highlighted.

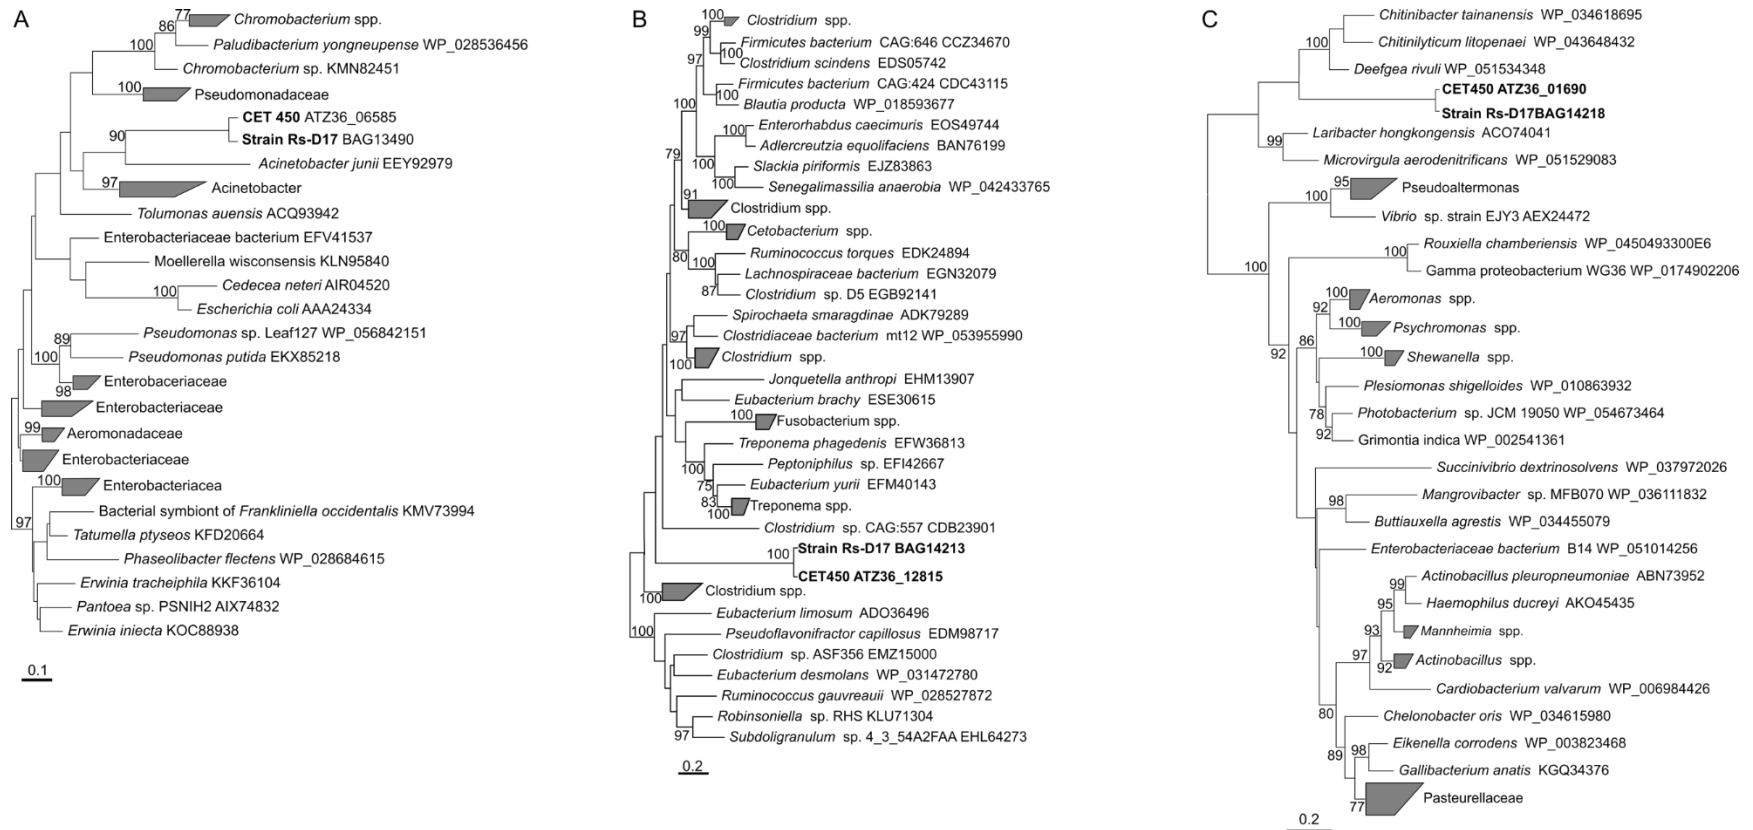

**Fig. S5** Phylogenetic analysis of transporter proteins for (A) aromatic amino acid (AroP), (B) proline (ProT), and (C) serine (SdaC). The unrooted maximum-likelihood trees are based on alignments of amino acid sequences of the top 50 BLAST hits of the orthologs in strain Rs-D17 against the UniRef90 database (1). The trees were inferred under the WAG+G+I+F model. Orthologs in *Endomicrobia* endosymbionts are shown in bold.

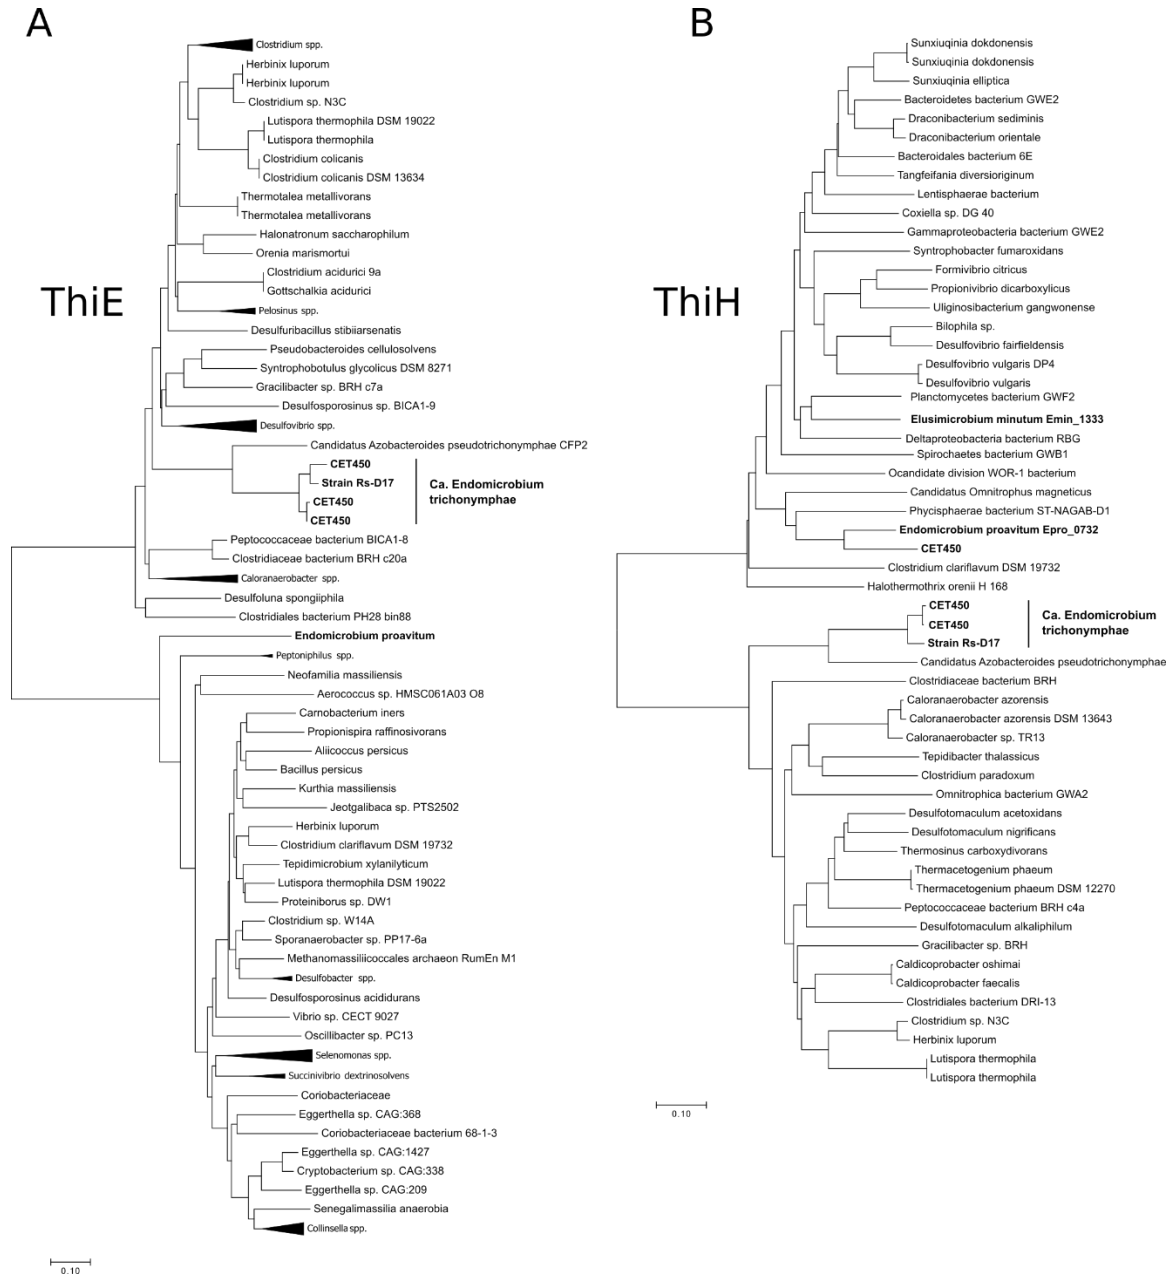

**Fig. S6** Phylogenetic analysis of amino acid sequences of ThiE (A) and ThiH (B). The unrooted maximum-likelihood trees are based on alignments of amino acid sequences of the top BLAST hits of the orthologs in strain Rs-D17 against the UniRef90 database (1). The trees were inferred under the WAG+G+I+F model. Orthologs from *Endomicrobia* are shown in bold

## References

1. **Suzek BE, Huang H, McGarvey P, Mazumder R, Wu CH.** 2007. UniRef: comprehensive and non-redundant UniProt reference clusters. *Bioinformatics* **23**:1282-1288.
2. **Markowitz VM, Mavromatis K, Ivanova NN, Chen IM, Chu K, Kyrpides NC.** 2009. IMG ER: a system for microbial genome annotation expert review and curation. *Bioinformatics* **25**:2271–2278.
3. **Greening C, Biswas A, Carere CR, Jackson CJ, Taylor MC, Stott MB, Cook GM, Morales SE.** 2016. Genomic and metagenomic surveys of hydrogenase distribution indicate H<sub>2</sub> is a widely utilised energy source for microbial growth and survival. *ISME J* **10**:761-777.
